# Supplementary material for: Gender Specific Association of RAS Gene Polymorphism with Essential Hypertension: A Case-Control Study
Source: Hindawi journal article supplement (doi:10.1155/2014/538053), 2014-01-01
Supplement: f1 [file 538053.f1.pdf]

## SUPPLEMENTARY INFORMATION

Supplementary Table 1. Details of the oligonucleotides for amplification and screening for four RAS polymorphisms using allele specific primer and PCR-RFLP methods.

| SNPs                     | F:Forward primer<br>R:Reverse primer                                      | PCR cycling conditions (sec/min) | Restriction endonuclease              | PCR product (bp)          | Restriction fragment size (bp) | References |
|--------------------------|---------------------------------------------------------------------------|----------------------------------|---------------------------------------|---------------------------|--------------------------------|------------|
| AGT M235T                | F: TGACAGGATGGAAGACTGGCT<br>GCTCCCTGC<br>R: AGCAGAGAGGTTTGCCTTACC<br>TCTG | Tm = 60°C<br>for 45s             | <i>Msp I</i>                          | 104 bp                    | 73, 31                         | [1]        |
| ACE II                   | F: GCCCTGCAGGTGTCTGCAGCATG<br>T<br>R: GGATGGCTCTCCCCGCCTTGTCT<br>C        | Tm = 56°C<br>for 45s             | PCR 287 bp Alu insertion in intron 16 | DD: 319 and II: 97        |                                | [2]        |
| ACE DD                   | F: TGGGACCAGAGCGCCCGCCACT<br>AC<br>R: TCGCCAGCCCTCCCATGCCATA<br>A         | Tm = 76 °C<br>for 30s            |                                       | II: 335<br>DD: no product |                                |            |
| ACE G2350A               | F: CTGACGAATGTGATGGCCGC<br>R: TTGATGAGTTCCACGTATTTTCG                     | Tm = 58°C<br>for 30s             | <i>BstUI</i>                          | 122                       | 100, 22                        | [3]        |
| AT <sub>1</sub> R A1166C | F: AATGCTTGTAGCCAAAGTCAC<br>CT<br>R: GGCTTTGCTTTGTCTTGTTG                 | Tm = 60°C<br>for 1 min           | <i>DdeI</i>                           | 850                       | 600 and 250; 600, 140 and 110  | [4]        |

## References

1. K. A. Reis, B. Onal, S. Gonen, et al., “Angiotensinogen and Plasminogen Activator Inhibitor-1 Gene Polymorphism in Relation to Renovascular Disease. *CardioVascular and Interventional Radiology*, vol. 29, pp. 59-63, 2006.
2. E Martí nez, A Puras, J Escribano, et al., “Angiotensin-converting enzyme (ACE) gene polymorphisms, serum ACE activity and blood pressure in a Spanish-Mediterranean population,” *Journal of Human Hypertension*, vol. 14, pp. 131–135, 2000.
3. M. Saeed Mahmood, K. Saboohi, S. Osman Ali, et al., “Association of the angiotensin-converting enzyme (ACE) gene G2350A dimorphism with essential hypertension,” *Journal of Human Hypertension*, vol. 17, no. 10, pp. 719-723, 2003.
4. A. V. Lapierre, M. E. Arce, J. R. Lopez, et al., “Angiotensin II type 1 receptor A1166C gene polymorphism and essential hypertension in San Luis,” *Biocell*, vol. 30, no. 3, pp. 447-455, 2006.
